# Supplementary material for: Immobilization adjusted clock reaction in the urea–urease–H+ reaction system
Source: Royal Society of Chemistry journal article supplement (doi:10.1039/c8ra09244c), 2019-01-01
Supplement: c8ra09244c1.pdf [file c8ra09244c1.pdf]

$$\frac{d[\text{OH}^-]}{dt} = A_5 \quad (\text{S12})$$

### Electronic supplementary information

The enzyme-catalysed hydrolysis of urea yields ammonia and carbon dioxide.

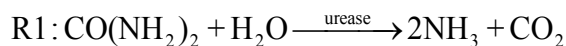

The pH is determined by the following equilibria

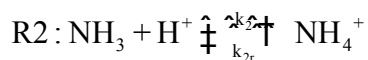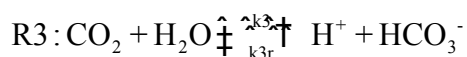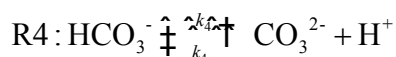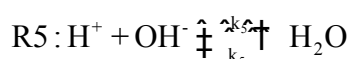

$$A_2 = k_2[\text{NH}_3][\text{H}^+] - k_{2r}[\text{NH}_4^+] \quad (\text{S1})$$

$$A_3 = k_3[\text{HCO}_3^-][\text{H}^+] - k_{3r}[\text{CO}_2] \quad (\text{S2})$$

$$A_4 = k_{4r}[\text{HCO}_3^-] - k_4[\text{CO}_3^{2-}][\text{H}^+] \quad (\text{S3})$$

$$A_5 = k_{5r} - k_5[\text{H}^+][\text{OH}^-] \quad (\text{S4})$$

The rate equations corresponding to the full mechanism given by R1-R5 are the following:

$$\frac{d[\text{CO}(\text{NH}_2)_2]}{dt} = -R \quad (\text{S5})$$

$$\frac{d[\text{NH}_3]}{dt} = 2R - A_2 \quad (\text{S6})$$

$$\frac{d[\text{NH}_4^+]}{dt} = A_2 \quad (\text{S7})$$

$$\frac{d[\text{CO}_2]}{dt} = R + A_3 \quad (\text{S8})$$

$$\frac{d[\text{HCO}_3^-]}{dt} = -A_3 - A_4 \quad (\text{S9})$$

$$\frac{d[\text{CO}_3^{2-}]}{dt} = A_4 \quad (\text{S10})$$

$$\frac{d[\text{H}^+]}{dt} = A_5 + A_4 - A_3 - A_2 \quad (\text{S11})$$

With R is defined with equation described in the main text.

Table S1 Other parameters used in the simulation of immobilization effect

| Parameters                             | value                | Parameters                                           | value                |
|----------------------------------------|----------------------|------------------------------------------------------|----------------------|
| $k_2 / \text{M}^{-1} \text{s}^{-1}$    | $4.3 \times 10^{10}$ | $K_E / \text{mL U}^{-1} \text{M}^{-1} \text{s}^{-1}$ | $3.7 \times 10^{-6}$ |
| $k_{2r} / \text{s}^{-1}$               | 24                   | $K_m / \text{M}$                                     | $3 \times 10^{-3}$   |
| $k_3 / \text{s}^{-1}$                  | $3.7 \times 10^{-2}$ | $K_s / \text{M}$                                     | 3                    |
| $k_{3r} / \text{M}^{-1} \text{s}^{-1}$ | $7.9 \times 10^4$    | $k_5 / \text{M}^{-1} \text{s}^{-1}$                  | $10^{11}$            |
| $k_4 / \text{s}^{-1}$                  | 2.8                  | $k_{5r} / \text{s}^{-1}$                             | $10^{-3}$            |
| $k_{4r} / \text{M}^{-1} \text{s}^{-1}$ | $5 \times 10^{10}$   |                                                      |                      |
